# Supplementary material for: Interactions between amphiphilic Janus nanosheets and a nonionic polymer in aqueous and biphasic systems
Source: Royal Society of Chemistry journal article supplement (doi:10.1039/c9sm00994a), 2019-01-01
Supplement: c9sm00994a1.pdf [file c9sm00994a1.pdf]

## Supporting Information

### Interactions between Amphiphilic Janus Nanosheets and a Nonionic Polymer in Aqueous and Biphasic Systems

*Dan Luo,<sup>a,\*,‡</sup> Fanghao Zhang,<sup>a,b,‡</sup> Fazhu Ding<sup>a,c</sup> Bushi Ren,<sup>d,e</sup> Zhifeng Ren<sup>a,\*</sup>*

<sup>a</sup>Department of Physics and TcSUH, University of Houston, Houston, Texas 77204, United States;

<sup>b</sup>Department of Chemistry, University of Houston, Houston, Texas 77204, United States;

<sup>c</sup>Key Laboratory of Applied Superconductivity and Institute of Electrical Engineering, Chinese Academy of Sciences, Beijing 100190, China

<sup>d</sup>BeKool Technologies, Ltd., Houston, Texas 77023, United States;

<sup>e</sup>Ningbo Fengcheng Advanced Energy Materials Research Institute, Ningbo, 315000, China

#### Corresponding Authors:

\*[zren@uh.edu](mailto:zren@uh.edu)

\*[danluo1101@gmail.com](mailto:danluo1101@gmail.com)

<sup>‡</sup>These authors contribute equally.

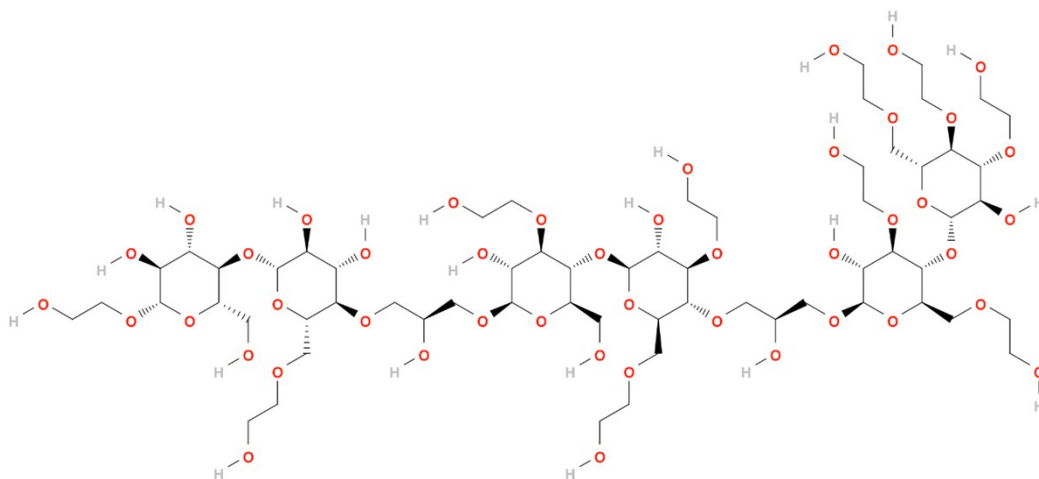

**Figure S1.** 2D structure of the HEC molecule used in the simulations.

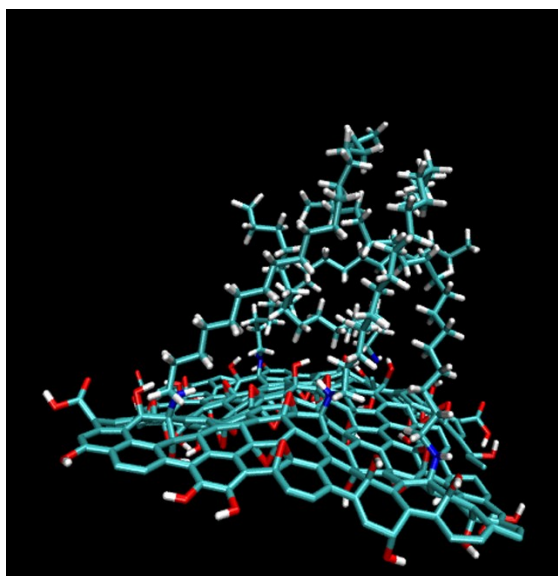

**Figure S2.** MD simulation of a graphene-based amphiphilic Janus nanosheet in water.

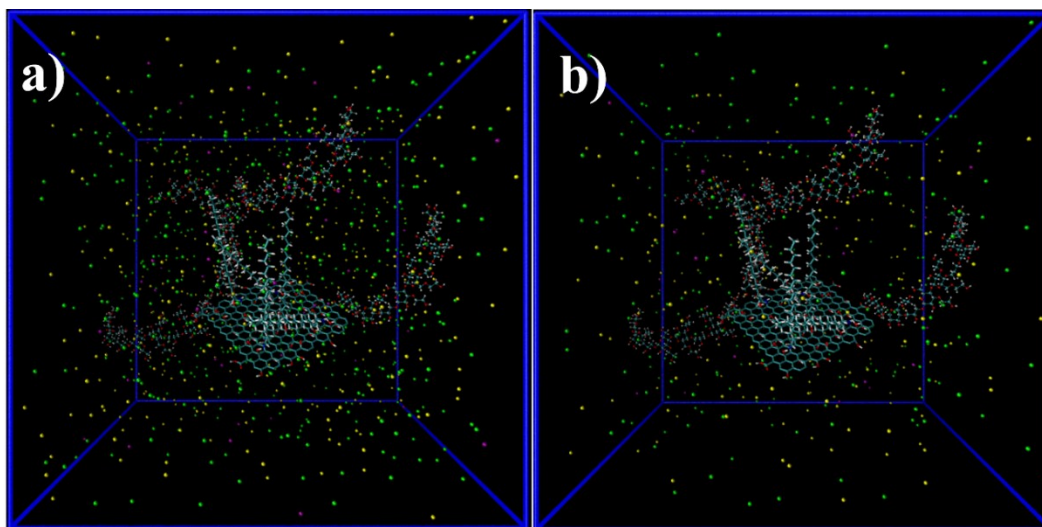

**Figure S3.** The initial states of MD simulations between one amphiphilic Janus nanosheet and four HEC molecules in **a)** high-salt condition (8 wt.% NaCl and 2 wt.%  $\text{CaCl}_2$ ) and **b)** low-salt condition (4 wt.% NaCl and 1 wt.%  $\text{CaCl}_2$ ).

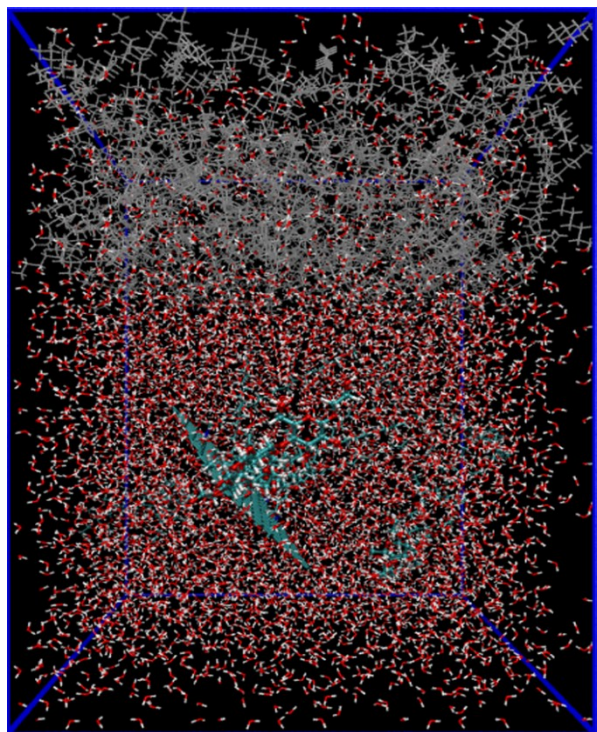

**Figure S4.** The initial state of MD simulations between one amphiphilic Janus nanosheet and four HEC molecules in a biphasic system with a high ionic condition (8 wt.% NaCl and 2 wt.%  $\text{CaCl}_2$ ).
